# Supplementary material
Source: publisher figshare collection journal article supplement (https://frontiersin.figshare.com/ndownloader/files/16251872)
Supplement: Supplementary file 1 [file 16251872]

## Sheet: soil_variables
Sample_names	moisture (%)	P (%)	K (%)	Mg (%)	Ca (%)	pH (-)	Ctot (gC/kg soil)	Ntot (g/kg)	C/N (-)	clay (%)	silt (%)	sand (%)	CECm (cmolc/kg)	HWC (gC/kg soil)	macro (%)	micro (%)	silt-clay (%)	agg.stability (-)
001SandCONV1	5.64521	9.28	11.7983	9.27621	99.0139	5.33	13.6	0.1413	9.62491	7.18065	24.5654	68.254	9.28	0.351587	22.69	24.83	52.48	5.78
002SandCONV1	7.14669	10.999	8.30971	10.6679	116.164	5.14	17.9	0.1581	11.3219	7.18065	24.5654	68.254	10.48	0.314286	22.69	24.83	52.48	5.78
003SandCONV1	6.74409	6.685	11.434	10.647	99.3353	5.02	13.73	0.1377	9.97095	7.18065	24.5654	68.254	10.24	0.365293	22.69	24.83	52.48	5.78
004SandCONV2	4.03041	8.915	13.5322	7.37166	86.9232	5.36	14.34	0.1334	10.7496	5.27744	24.8794	69.8432	8.32	0.356013	11.99	25.28	62.73	5.3
005SandCONV2	4.0198	7.67	11.8365	6.74721	74.9852	5.14	14.07	0.1253	11.229	5.27744	24.8794	69.8432	8.64	0.327476	11.99	25.28	62.73	5.3
006SandCONV2	4.77244	8.145	12.1249	7.00149	96.6801	5.31	13.54	0.1258	10.7631	5.27744	24.8794	69.8432	8.32	0.262698	11.99	25.28	62.73	5.3
007SandCONV3	3.41444	11.494	17.6958	5.89365	62.7514	5.48	9.52	0.08283	11.4946	5.97193	25.754	68.2741	9.28	0.253165	13.37	23.66	62.97	5.44444
008SandCONV3	3.54766	6.957	10.0311	4.57315	68.737	5.53	8.21	0.07821	10.5012	5.97193	25.754	68.2741	6.24	0.161905	13.37	23.66	62.97	5.44444
009SandCONV3	4.40483	7.281	13.6576	5.58118	70.9317	5.9	9.59	0.08352	11.4847	5.97193	25.754	68.2741	6.24	0.228571	13.37	23.66	62.97	5.44444
010SandAECO1	7.27546	3.269	9.17235	7.08057	82.7103	4.61	14.33	0.1396	10.265	8.21386	25.0149	66.7712	9.28	0.430269	13.61	49.93	36.46	6
011SandAECO1	7.6305	12.094	10.7856	7.43323	122.657	5.41	15.98	0.1539	10.3834	8.21386	25.0149	66.7712	9.6	0.321767	13.61	49.93	36.46	6
012SandAECO1	8.29773	6.552	13.0617	6.98145	101.98	5.09	15.51	0.1489	10.4164	8.21386	25.0149	66.7712	9.28	0.408082	13.61	49.93	36.46	6
013SandAECO2	7.0993	6.669	16.6465	6.60232	80.5015	5.06	16.55	0.1653	10.0121	6.39386	25.1993	68.4068	9.12	0.392687	7.27	42.7	50.03	5.9
014SandAECO2	5.60389	6.969	10.4666	5.35411	74.2778	5.06	11.64	0.1104	10.5435	6.39386	25.1993	68.4068	7.84	0.296825	7.27	42.7	50.03	5.9
015SandAECO2	6.54938	6.496	15.4142	7.69463	85.5863	5.03	18.38	0.1614	11.3879	6.39386	25.1993	68.4068	8.96	0.424723	7.27	42.7	50.03	5.9
016SandAECO3	6.11868	6.453	11.8663	7.07027	110.116	5.94	17.17	0.1531	11.2149	6.02319	23.3399	70.637	8.64	0.335714	13.97	32.7	53.33	6
017SandAECO3	6.29007	7.572	9.34602	6.20826	118.543	5.89	12.59	0.12	10.4917	6.02319	23.3399	70.637	8.32	0.249604	13.97	32.7	53.33	6
018SandAECO3	6.6467	7.693	13.0119	7.03968	103.969	5.62	15.61	0.1507	10.3583	6.02319	23.3399	70.637	9.28	0.326984	13.97	32.7	53.33	6
019SiltCONV1	9.70465	10.695	16.0305	20.7265	227.089	6.39	12.22	0.1288	9.48758	17.2517	66.0066	16.7417	16.8	0.268382	35.97	32.02	32.02	4.89
020SiltCONV1	12.5224	10.204	19.4331	20.6376	314.367	6.38	13.42	0.1537	8.73129	17.2517	66.0066	16.7417	20.8	0.226112	35.97	32.02	32.02	4.89
021SiltCONV1	10.1771	14.916	20.27	18.2038	211.876	6.28	13.12	0.1385	9.47292	17.2517	66.0066	16.7417	15.2	0.2868	35.97	32.02	32.02	4.89
022SiltCONV2	10.7895	11.278	17.8184	16.5268	297.637	6.09	13.9	0.1519	9.15076	20.3897	63.0569	16.5534	21.44	0.326667	17.7	51.54	30.76	3.44
023SiltCONV2	10.5795	10.473	16.7956	14.5369	299.831	6.45	12.98	0.1425	9.10877	20.3897	63.0569	16.5534	19.84	0.231997	17.7	51.54	30.76	3.44
024SiltCONV2	10.7555	9.612	17.9015	14.4212	309.748	6.4	13.97	0.1503	9.29474	20.3897	63.0569	16.5534	19.04	0.214927	17.7	51.54	30.76	3.44
025SiltCONV3	9.83052	10.919	9.44514	11.4212	378.659	7.33	14.38	0.1509	9.52949	16.2215	62.6226	21.1559	17.12	0.307629	30.99	38.79	30.21	3.67
026SiltCONV3	9.10508	14.799	14.2361	13.8797	581.488	7.59	15.83	0.1574	10.0572	16.2215	62.6226	21.1559	15.68	0.324959	30.99	38.79	30.21	3.67
027SiltCONV3	9.18342	15.93	17.0643	11.3553	446.237	7.49	15.85	0.1573	10.0763	16.2215	62.6226	21.1559	16	0.359302	30.99	38.79	30.21	3.67
028SiltAECO1	10.5083	19.527	19.9714	9.94223	288.531	6.45	20.48	0.2011	10.184	12.5858	59.4966	27.9176	16.16	0.581395	38.25	32.27	29.47	5.89
029SiltAECO1	11.2354	15.146	14.5807	9.8138	423.497	7.15	17.79	0.1722	10.331	12.5858	59.4966	27.9176	17.12	0.482202	38.25	32.27	29.47	5.89
030SiltAECO1	12.3016	13.601	11.5627	7.03354	391.252	7.18	16.59	0.1643	10.0974	12.5858	59.4966	27.9176	14.72	0.41748	38.25	32.27	29.47	5.89
031SiltAECO2	10.8287	23.175	9.47153	5.34261	637.434	7.47	11.79	0.1254	9.40191	11.4277	50.6628	37.9095	11.04	0.256623	52.68	21.81	25.51	5.78
032SiltAECO2	10.5707	19.888	12.1104	5.16997	330.742	7.19	12.89	0.1264	10.1978	11.4277	50.6628	37.9095	11.04	0.282917	52.68	21.81	25.51	5.78
033SiltAECO2	7.23863	29.667	12.1329	5.06708	528.969	7.37	13.2	0.1217	10.8463	11.4277	50.6628	37.9095	10.88	0.283997	52.68	21.81	25.51	5.78
034SiltAECO3	8.1841	16.955	8.17759	6.25655	1238.85	7.76	10.46	0.1131	9.24845	9.97851	54.498	35.5235	9.28	0.201939	48.29	22.28	29.43	5.89
035SiltAECO3	8.37086	19.104	8.17067	3.98623	527.083	7.53	12.15	0.1146	10.6021	9.97851	54.498	35.5235	9.76	0.306726	48.29	22.28	29.43	5.89
036SiltAECO3	8.84009	21.053	11.608	5.05485	609.599	7.46	10.57	0.1212	8.72112	9.97851	54.498	35.5235	10.08	0.237957	48.29	22.28	29.43	5.89
